# Supplementary material
Source: publisher site journal article supplement (https://www.dovepress.com/article/474329)
Supplement: Supplementary file 1 [file get_supplementary_file.php]

**Table S1** Sequences of the gene-specific primers and siRNA

| Gene | Sequences | Species |
| --- | --- | --- |
| *β-ACTIN* | Forward, TGTCCACCTTCCAGCAGATGT | Rat |
| *β-ACTIN* | Reverse, AGCTCAGTAACAGTCCGCCTAGA | Rat |
| *IL-1β* | Forward, TCCTCTGTGACTCGTGGGAT | Rat |
| *IL-1β* | Reverse, TCAGACAGCACGAGGCATTT | Rat |
| *IL-6* | Forward, CCACTGCCTTCCCTACTTCA | Rat |
| *IL-6* | Reverse, ACAGTGCATCATCGCTGTTC | Rat |
| *iNOS* | Forward, TGCCTTTGCTCATGACATCG | Rat |
| *iNOS* | Reverse, AACACGTTCTTGGCGTGGA | Rat |
| *MCP-1* | Forward, TTAATGCCCCACTCACCTGC | Rat |
| *MCP-1* | Reverse, AGCTTCTTTGGGACACCTGC | Rat |
| *IL-10* | Forward, AGTGGAGCAGGTGAAGAATGA | Rat |
| *IL-10* | Reverse, ATTTGCTGGTTCCCACACTC | Rat |
| *ARG-1* | Forward, ACCCTGACCTATGCGTCATT | Rat |
| *ARG-1* | Reverse, ATTCCCAGAGCTGGTTGTCA | Rat |
| *SIRT1* | Forward, GTGTCATAGGTTAGGTGGCGAG | Rat |
| *SIRT1* | Reverse, GAAGAGGTGTTGGTGGCAACTC | Rat |
| *PPARγ* | Forward, GGAGATCCTCCTGTTGACCC | Rat |
| *PPARγ* | Reverse, TGGGTCAGCTCTTGTGAACG | Rat |
| siSIRT1 | Forward, UGUCAGAUAAGGAAGGAAATT | Rat |
| siSIRT1 | Reverse, UUUCCUUCCUUAUCUGACATT | Rat |

**Figure S1** The impacts of NMN on SIRT1 activity in HepG2 cells


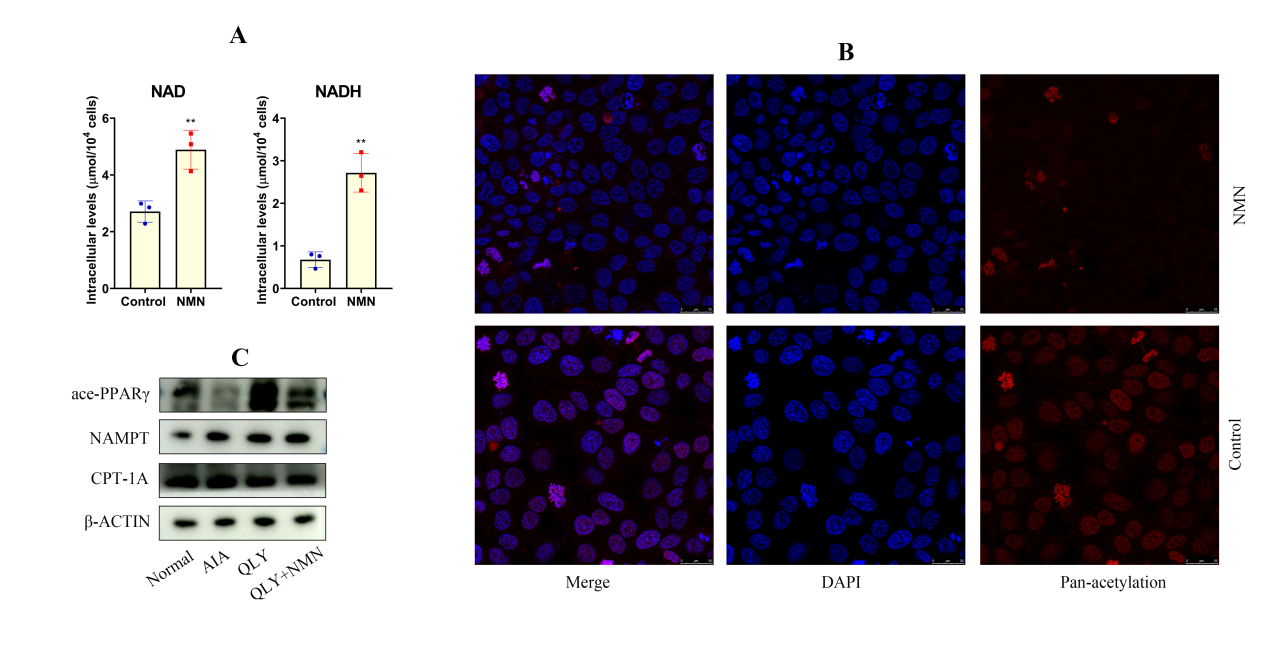


**A**, NMN promoted NAD and NADH production; **B**, NMN promoted the functions of SIRT1, indicated by the increased expression of pan-acetylated proteins; **C**, NMN impaired QLY-caused changes in SIRT1 downstream signals. Statistical significance: **p < 0.01 compared with untreated cells.
